# Supplementary material for: Strategy for Identification of Phosphorylation Levels of Low Abundance Proteins in Vivo for Which Antibodies Are not Available
Source: J Cardiovasc Dev Dis. 2017 Oct 8;4(4):17. doi: 10.3390/jcdd4040017 (PMC5753118; doi:10.3390/jcdd4040017)
Supplement: Supplementary file 1 [file jcdd-04-00017-s001.xlsx]

## Sheet: Table DCt
	Table S1. Raw data for quantitative reverse transcription PCR
		Experimental No.	Ct		DCt (Ct Adrb1-Ct Gapdh)	Average of DCt	2-(DCt)	The mean of experimental group	SD
			Adrb1	GAPDH
	Wild-type	1	25.9507	18.8094	7.14127	6.81114	0.00890518	0.0103493	0.0012667
			25.5548	19.0738	6.48101
		2	25.347	18.4662	6.88079	6.52349	0.0108701
			25.8159	19.6497	6.1662
		3	25.482	18.9891	6.49289	6.47104	0.0112725
			25.8003	19.3512	6.44919
	KI hetero	1	23.4739	18.4292	5.04478	4.89057	0.0337126	0.0369013	0.00737782
			23.6432	18.9068	4.73635
		2	23.3856	18.9038	4.4818	4.46316	0.0453371
			23.2713	18.8268	4.44452
		3	23.9047	18.6907	5.21395	4.98146	0.0316541
			23.9921	19.2432	4.74898
		Experimental No.	Ct		DCt (Ct Sig-S Flag-Ct Gapdh)	Average of DCt	2-(DCt)	The mean of experimental group	SD
			Sig-S Flag	GAPDH
	Wild-type	1	ND	18.2789	ND	ND	ND	ND	ND
			ND	18.461	ND
		2	ND	19.4128	ND	ND	ND
			ND	19.2137	ND
		3	ND	18.8772	ND	ND	ND
			ND	18.47	ND
	KI hetero	1	25.7759	18.9114	6.86448	7.17118	0.00693839	0.00647209	0.00073272
			25.6491	18.1712	7.47789
		2	25.6632	18.2806	7.38262	7.47328	0.00562755
			25.6552	18.0913	7.56394
		3	26.1877	19.0421	7.14567	7.18961	0.00685034
			26.1065	18.873	7.23355
