# Supplementary material for: Strategy for Identification of Phosphorylation Levels of Low Abundance Proteins in Vivo for Which Antibodies Are not Available
Source: J Cardiovasc Dev Dis. 2017 Oct 8;4(4):17. doi: 10.3390/jcdd4040017 (PMC5753118; doi:10.3390/jcdd4040017)
Supplement: Supplementary file 2 [file jcdd-04-00017-s002.xlsx]

## Sheet: Table S1
Table S2. Raw data for tryptic peptide fragments and phosphorylation ratios in FLAG-Adrb1 KI mouse heart
Sequence	Start	End	Rt	Fr	m/z	charge	Experiment No.	peak area	retention time (min)	Peptide ratio (Phospho/Nonphospho)
	265	294	19.4	12			1	12803302	18.4	0.310978	0.25±0.058a
								3981539	19.1
FLGGPARPPSPEPSPSPGPPRPADSLANGR					745.39	4	2	36865623	19.1	0.223466
FLGGPARPPpSPEPSPSPGPPRPADSLANGR			20.5	12	765.38	4		8238208	20.3
							3	46656503	19.1	0.202452
								9445705	20.4
	407	431	13.9	12			1	6850129	12.7	0.546096	0.56±0.070a
								3740825	13.5
AGPPPSPGAPSDDDDDDAGTTPPAR					792.68	3	2	13958234	13.9	0.503397
AGPPPSPGAPpSDDDDDDAGTTPPAR					819.34	3		7026530	14.9
			14.6	12			3	18492560	14.1	0.640123
								11837506	14.8
	458	466	12	7			1	4601272	10.7	0.00231675	0.0023b
								10660	13.3
QGFSSESKV					484.74	2	2	6443940	12
QGFSpSESKV					524.72	2		ND	ND
							3	5520069	12.2	0.00226718
								12515	14.8
YQSLLTR	166	172			440.75	2	1	37559819	16.1
							2	37357813	15.9
							3	46048064	16
LLCCAR	379	384			396.7	2	1	17251331	9.62
							2	13402210	9.9
							3	19772071	9.42
LLEPWTGCNGGTTTVDSDSSLDEPGR	432	457	25.7	4	922.09	3	1	187980	24.1
							2	956810	25.4
							3	2399434	25.5
								aEach value shows the mean ± SD (n=3). bMean of two experiments.
